# Supplementary material for: Rifapentine access in Europe: growing concerns over key tuberculosis treatment component
Source: PubMed Central journal article supplement — Eur Respir J. 2022 May 19;59(5):2200388. doi: 10.1183/13993003.00388-2022 (PMC9186306; doi:10.1183/13993003.00388-2022), 2022-05-19
Supplement: ERJ-00388-2022.Shareable.pdf [file ERJ-00388-2022.Shareable.pdf]

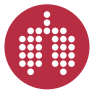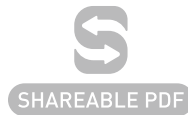

# Rifapentine access in Europe: growing concerns over key tuberculosis treatment component

Lorenzo Guglielmetti <sup>1,2,3</sup>, Gunar Günther <sup>4,5</sup>, Claude Leu <sup>4</sup>, Daniela Cirillo <sup>6</sup>, Raquel Duarte <sup>7,8,9,10</sup>, Alberto L. Garcia-Basteiro <sup>11,12</sup>, Delia Goletti <sup>13</sup>, Mateja Jankovic <sup>14</sup>, Liga Kukša <sup>15,16</sup>, Florian P. Maurer <sup>17,18,19</sup>, Frédéric Méchai <sup>20</sup>, Simon Tiberi <sup>21,22</sup>, Frank van Leth <sup>23,24</sup>, Nicolas Veziris <sup>2,25,26</sup> and Christoph Lange <sup>19,27,28,29</sup> on behalf of the Study Group on Mycobacteria of the European Society of Microbiology and Infectious Diseases (ESGMYC), European Society of Mycobacteriology (ESM), European Respiratory Society (ERS) and the Tuberculosis Network European Trials group (TBnet)

<sup>1</sup>Sorbonne Université, INSERM, U1135, Centre d'Immunologie et des Maladies Infectieuses, Cimi-Paris, Paris, France. <sup>2</sup>APHP, Groupe Hospitalier Universitaire Sorbonne Université, Hôpital Pitié-Salpêtrière, Centre National de Référence des Mycobactéries et de la Résistance des Mycobactéries aux Antituberculeux, Paris, France. <sup>3</sup>APHP, Infectious Disease Unit, Avicenne Hospital, Bobigny, France. <sup>4</sup>Department of Pulmonology, Inselspital, Bern University Hospital, University of Bern, Bern, Switzerland. <sup>5</sup>Department of Internal Medicine, School of Medicine, University of Namibia, Windhoek, Namibia. <sup>6</sup>WHO Collaborating Centre and TB Supranational Reference Laboratory, San Raffaele Scientific Institute, Milano, Italy. <sup>7</sup>Epidemiology Research Unit (EpiUnit), Institute of Public Health, University of Porto, Porto, Portugal. <sup>8</sup>Departamento de Ciências de Saúde Pública, Ciências Forenses e Educação Médica, Faculty of Medicine, University of Porto, Porto, Portugal. <sup>9</sup>Serviço de Pneumologia, Centro Hospitalar de Vila Nova de Gaia/Espinho, Vila Nova de Gaia, Portugal. <sup>10</sup>National Tuberculosis Program, Directorate-General of Health, Lisbon, Portugal. <sup>11</sup>Centro de Investigação em Saúde de Manhiça (CISM), Maputo, Moçambique. <sup>12</sup>ISGlobal, Hospital Clínic - Universitat de Barcelona, Barcelona, Spain. <sup>13</sup>National Institute for Infectious Diseases L. Spallanzani-IRCCS, Rome, Italy. <sup>14</sup>Clinic for Lung Diseases, University of Zagreb School of Medicine and University Hospital Center Zagreb, Zagreb, Croatia. <sup>15</sup>Riga East University Hospital, TB and Lung Disease Centre, Riga, Latvia. <sup>16</sup>Riga Stradins University, Riga, Latvia. <sup>17</sup>National and Supranational Reference Center for Mycobacteria, Research Center Borstel, Borstel, Germany. <sup>18</sup>Institute of Medical Microbiology, Virology and Hygiene, University Medical Center Hamburg-Eppendorf, Hamburg, Germany. <sup>19</sup>German Center for Infection Research (DZIF), Partner Site Hamburg-Lübeck-Borstel-Riems, Borstel, Germany. <sup>20</sup>APHP, Infectious Disease Unit, Avicenne Hospital, Université Paris 13, IAME, INSERM, Bobigny, France. <sup>21</sup>Blizard Institute, Barts and The London School of Medicine and Dentistry, Queen Mary University, London, UK. <sup>22</sup>Royal London Hospital, Barts Health National Health Service Trust, London, UK. <sup>23</sup>VU University, Department of Health Sciences, Amsterdam, The Netherlands. <sup>24</sup>Amsterdam Public Health Research Institute, Amsterdam, The Netherlands. <sup>25</sup>APHP, Groupe Hospitalier Universitaire Sorbonne Université, site Saint-Antoine, Département de bactériologie, Paris, France. <sup>26</sup>Sorbonne Université, INSERM, U1135, Centre d'Immunologie et des Maladies Infectieuses, Cimi-Paris, équipe 13, Paris, France. <sup>27</sup>Division of Clinical Infectious Diseases, Research Center Borstel, Borstel, Germany. <sup>28</sup>Respiratory Medicine and International Health, University of Lübeck, Lübeck, Germany. <sup>29</sup>Baylor College of Medicine and Texas Children's Hospital, Global TB Program, Houston, TX, USA.

Corresponding author: Lorenzo Guglielmetti ([lorenzo.guglielmetti@aphp.fr](mailto:lorenzo.guglielmetti@aphp.fr))

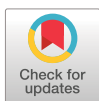

Shareable abstract (@ERSpublications)

**Lack of access to rifapentine in Europe denies patients optimal care for active tuberculosis and latent tuberculosis infection, and deprives healthcare providers of adequate tools to pursue tuberculosis control and elimination** <https://bit.ly/3jz85eh>

**Cite this article as:** Guglielmetti L, Günther G, Leu C, *et al.* Rifapentine access in Europe: growing concerns over key tuberculosis treatment component. *Eur Respir J* 2022; 59: 2200388 [DOI: 10.1183/13993003.00388-2022].

This single-page version can be shared freely online.

Copyright ©The authors 2022. For reproduction rights and permissions contact [permissions@ersnet.org](mailto:permissions@ersnet.org)

Received: 20 Feb 2022  
Accepted: 6 April 2022

*To the Editor:*

Rifapentine, a synthetic derivative of rifampicin which was developed in 1965, has interesting pharmacological properties, including a long terminal half-life (13 h, compared to 2–3 h for rifampicin) and promising bactericidal activity against *Mycobacterium tuberculosis*. Despite being approved in 1998 by the US Food and Drug Administration (FDA) for the treatment of pulmonary tuberculosis, its global use has been limited by unavailability. In the past decade, new evidence has emerged to define rifapentine as a key component for treatment of active disease and latent infection with *M. tuberculosis* (LTBI).
